# Supplementary material
Source: PubMed Central journal article supplement (PMC10012731)

Valid days of movement behaviour data by participant

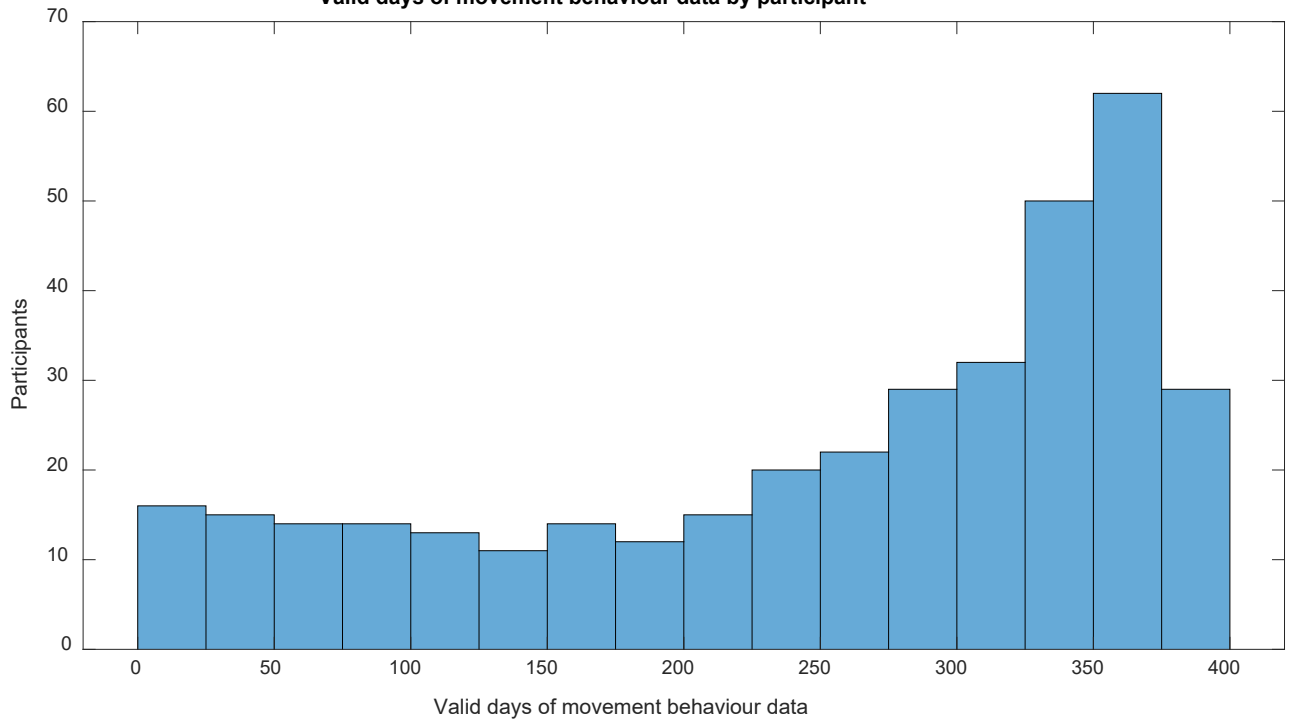

Supplement: 12966_2023_1414_MOESM1_ESM.pdf [file 12966_2023_1414_MOESM1_ESM.pdf]
