# Supplementary material
Source: PubMed Central journal article supplement (PMC10012731)
Supplement: 12966_2023_1414_MOESM2_ESM.pdf [file 12966_2023_1414_MOESM2_ESM.pdf]

Supplementary Table 1: Descriptive daily weather statistics

|                                    | Mean | SD  | Min  | Median | Max  | IQR | Range |
|------------------------------------|------|-----|------|--------|------|-----|-------|
| <b><i>Min temperature (°C)</i></b> |      |     |      |        |      |     |       |
| Overall                            | 11.3 | 4.5 | 0.4  | 11.0   | 31.6 | 5.4 | 31.2  |
| Wave 1                             | 11.4 | 4.9 | 0.04 | 20.5   | 31.6 | 5.9 | 31.6  |
| Wave 2                             | 11.2 | 4.1 | 1.78 | 11.0   | 26.4 | 4.9 | 24.6  |
| <b><i>Max temperature (°C)</i></b> |      |     |      |        |      |     |       |
| Overall                            | 21.3 | 6.6 | 8.4  | 20.4   | 43.5 | 9.5 | 35.1  |
| Wave 1                             | 21.6 | 6.9 | 9.5  | 11.2   | 43.5 | 9.9 | 34.0  |
| Wave 2                             | 21.2 | 6.1 | 8.4  | 20.6   | 41.7 | 9.6 | 33.3  |
| <b><i>Rainfall (mm)</i></b>        |      |     |      |        |      |     |       |
| Overall                            | 1.5  | 3.8 | 0    | 0.04   | 33.2 | 0.8 | 33.2  |
| Wave 1                             | 1.4  | 3.9 | 0    | 0.04   | 32.2 | 0.7 | 32.2  |
| Wave 2                             | 1.4  | 3.7 | 0    | 0.04   | 33.2 | 1.0 | 33.2  |
| <b><i>Wind speed (km/h)</i></b>    |      |     |      |        |      |     |       |
| Overall                            | 23.1 | 6.8 | 9.3  | 22.3   | 46.0 | 8.9 | 36.7  |
| Wave 1                             | 23.2 | 7.0 | 9.3  | 22.7   | 43.2 | 9.8 | 33.9  |
| Wave 2                             | 23.2 | 6.8 | 10.8 | 22.1   | 45.7 | 8.2 | 34.9  |
| <b><i>Sunshine (h)</i></b>         |      |     |      |        |      |     |       |
| Overall                            | 7.8  | 3.9 | 0    | 8.5    | 13.9 | 6.1 | 13.9  |
| Wave 1                             | 7.7  | 3.9 | 0    | 8.35   | 13.8 | 6.3 | 13.8  |
| Wave 2                             | 8.1  | 3.8 | 0    | 8.6    | 13.9 | 5.8 | 13.9  |
| <b><i>Cloud cover (/8)</i></b>     |      |     |      |        |      |     |       |
| Overall                            | 4.4  | 2.4 | 0    | 4.8    | 8.0  | 4.3 | 8.0   |
| Wave 1                             | 4.5  | 2.5 | 0    | 4.8    | 8.0  | 4.3 | 8.0   |
| Wave 2                             | 4.3  | 2.3 | 0    | 4.5    | 8.0  | 4.0 | 8.0   |

Notes: Overall = 1/12/2019 to 31/12/2021, Wave 1 = 1/12/2019 to 31/12/2020, Wave 2 = 1/12/2020 to 31/12/2021. IQR = interquartile range, max = maximum, min = minimum, SD = standard deviation.
